# Supplementary material for: Prevalence and Impact of Comorbidities in Individuals with Chronic Obstructive Pulmonary Disease: A Systematic Review
Source: PubMed Central journal article supplement — Tuberc Respir Dis (Seoul). 2022 May 27;85(3):205–20. doi: 10.4046/trd.2021.0179 (PMC9263346; doi:10.4046/trd.2021.0179), 2022-05-27
Supplement: trd-2021-0179-suppl.pdf [file trd-2021-0179-suppl.pdf]

**Supplementary Table S1.** Keywords used in the electronic search with the Boolean operators “AND” and “OR”

| <b>Keyword</b>                         | <b>Related keywords and synonyms</b>                                                                                                                                                                                                            |
|----------------------------------------|-------------------------------------------------------------------------------------------------------------------------------------------------------------------------------------------------------------------------------------------------|
| Pulmonary disease, chronic obstructive | Airflow obstructions, chronic; Chronic airflow obstructions; Airflow obstruction, Chronic; Chronic airflow obstruction; Chronic obstructive airway disease; Chronic obstructive lung disease; Chronic obstructive pulmonary disease; COAD; COPD |
| Comorbidity                            | Multimorbidity; Comorbidities; Multimorbidities                                                                                                                                                                                                 |
| Observational studies as topic         | Observational study as a topic                                                                                                                                                                                                                  |
